# Supplementary material for: Facile passivation of yellow light-emitting CdSe QDs by polyethyleneimine in water to achieve bright white light emission
Source: Royal Society of Chemistry journal article supplement (doi:10.1039/d1ma00717c), 2021-01-01
Supplement: d1ma00717c1.pdf [file d1ma00717c1.pdf]

## **Electronic Supplementary Information**

**For**

# **Facile passivation of yellow light emitting CdSe QDs by polyethyleneimine in water to achieve bright white light emission**

Bo-Yi Deng, Jin Wu, Jing Liu, Ying-Yi Ren, Feng Wang

### **Table of contents**

- 1. Chemicals and synthesis**
- 2. Instruments and methods**
- 3. UV-Vis absorption and PL spectra**
- 4. Component concentration effect and pH effect**
- 5. TEM and CLSM images**
- 6. Lifetimes**
- 7. Reference**

## 1. Chemicals and synthesis

Sodium sulfite, mercaptopropionic acid, sodium hydroxide, polyethyleneimine (PEI) ( $M_w = 60000$ , 50% aqueous solution), quinine, benzylamine, Se powder, cadmium chloride hydrate ( $\text{CdCl}_2 \cdot 2.5\text{H}_2\text{O}$ , 98%), sulfuric acid ( $\text{H}_2\text{SO}_4$ ), hydrochloric acid (HCl) was purchased from commercial suppliers (Sinopharm chemical reagent co., LTD, Adamas, and Sigma-Aldrich) and used without further purification.  $\text{N}_2$  (99.999%),  $\text{CO}_2$  (99.99%) were purchased from commercial supplier (Huaerwen). All solvents of analytical grade were purchased from commercial suppliers and used without further purification.

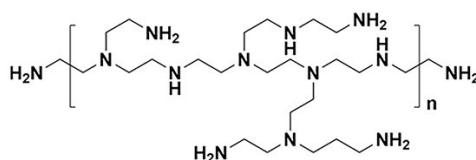

PEI ( $M_w = 60k$ )

**Figure S1.** Graph of PEI structure

### The synthesis of MPA-CdSe QDs

The MPA-CdSe QDs were synthesized according to the literature method with slight modification.<sup>[1]</sup> First,  $\text{Na}_2\text{SeSO}_3$  aqueous solution was prepared by following steps. Selenium powder (40 mg) was added into  $\text{Na}_2\text{SO}_3$  aqueous solution (100 mL, 1.50 mmol) and the mixture was stirred at 130 °C until the solid powder disappeared. In another flask,  $\text{CdCl}_2 \cdot 2.5\text{H}_2\text{O}$  (92 mg) and 3-mercaptopropionic acid (52  $\mu\text{L}$ ) in deionized water (380 mL) was prepared. The pH of the solution was adjusted to 11 by NaOH (1 M) and then saturated by nitrogen. A 20 mL  $\text{Na}_2\text{SeSO}_3$  solution was injected into the above solution. The mixture solution was stirred at 130 °C for 2.5 hours. The MPA-CdSe QDs as yellow solid was obtained

via subsequently participation by isopropanol, centrifugation, and drying in vacuum.

## 2. Instruments and methods

High-resolution TEM images were obtained by Titan G2 60-300 with an image corrector high-resolution transmission electron microscopy system (HRTEM) operating at 300 kV. The Confocal Microscope images were recorded by Chameleon LSM. The X-ray photoelectron spectroscopy (XPS) measurements were conducted using AXIS SUPRA+ spectrophotometer with Al-K $\alpha$  radiation. UV-Vis absorption spectra were recorded on a Shimadzu UV-2600 spectrophotometer in the range of 200-700 nm. The photoluminescence (PL) measurements were carried out by a RF-6000. The fluorescence lifetimes were measured by the QuantaMaster 8000. The pH measurements were determined with a Model pHs-3C meter (Mettler Toledo FE28, Swiss). The zeta potentials was measured by the Nano ZS90.

### CdSe@PEI solution preparation

The CdSe@PEI aqueous solution was prepared by physical mixing of PEI and MPA-CdSe QDs with certain amount. The solid CdSe@PEI gel was obtained by freeze-drying of CdSe@PEI aqueous solution.

### PLQY measurments

The PLQY values in this work were determined by using quinine as a reference (in 0.5 M H<sub>2</sub>SO<sub>4</sub> aqueous solution) and calculated according to the equation following:

$$\frac{\Phi_s}{\Phi_r} = \left(\frac{A_r}{A_s}\right) * \left(\frac{D_s}{D_r}\right) * \left(\frac{n_s}{n_r}\right)$$

$\Phi$  represents the quantum yield, A is the absorbance at the excitation

wavelength,  $D$  is emission area, and  $n$  is the refractive index. The reference quinine has a fluorescence quantum yield of 0.546 in a 0.5 M  $\text{H}_2\text{SO}_4$  aqueous solution [2].

### **$\text{CO}_2$ fluorescent sensor experiments**

The  $\text{CO}_2$  fluorescent sensor experiments were carried out by cyclic bubbling  $\text{CO}_2$  or  $\text{N}_2$  into a  $\text{CdSe@PEI}$  aqueous solution ( $[\text{CdSe}] = 1.00 \times 10^{-5} \text{ M}$ ,  $[\text{PEI}] = 5.00 \text{ mg mL}^{-1}$ ). The white light emission of the solution turns to yellow by bubbling  $\text{CO}_2$  for 30s, the recovery of the white light emission needs to bubble  $\text{N}_2$  for 50 mins.

### 3. UV-Vis absorption and PL spectra

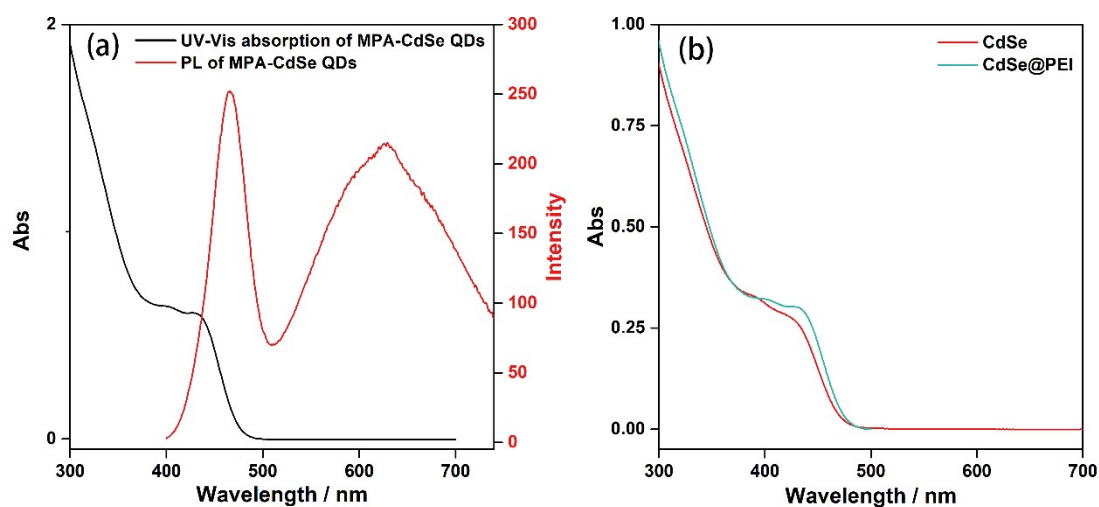

**Figure S2.** (a) UV-Vis absorption and PL spectra of MPA-CdSe QDs in water ( $1.00 \times 10^{-5}$  M), excitation wavelength: 380 nm. (b) UV-Vis absorption of MPA-CdSe QDs ( $1.00 \times 10^{-5}$  M) and CdSe@PEI ( $[\text{CdSe}] = 1.00 \times 10^{-5}$  M,  $[\text{PEI}] = 5.00 \text{ mg mL}^{-1}$ ) in water.

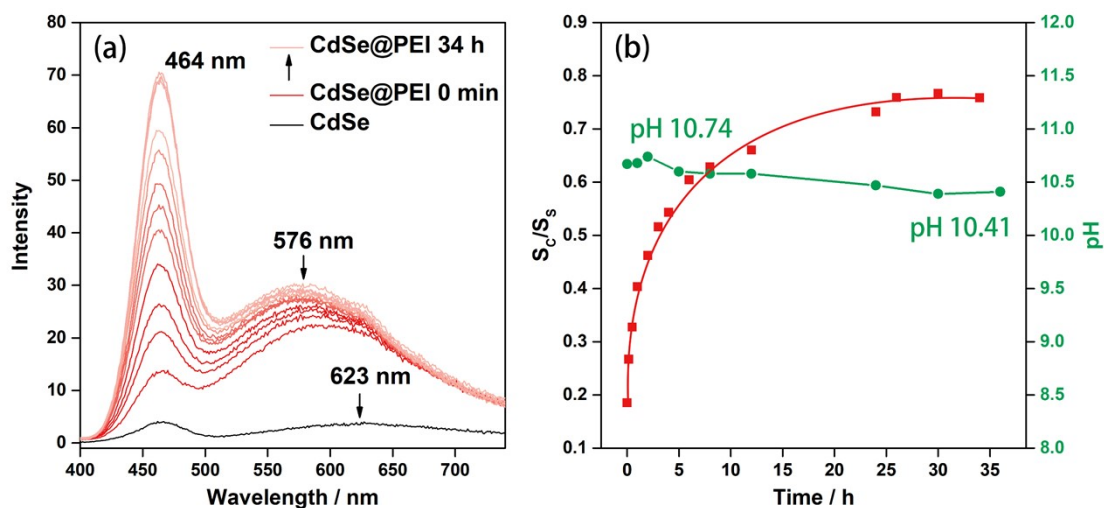

**Figure. S3** Change of CdSe@PEI ( $[\text{CdSe}] = 1.00 \times 10^{-5}$  M,  $[\text{PEI}] = 5.00 \text{ mg mL}^{-1}$ ) PL enhancement from 0 h to 34 h, excitation wavelength: 380 nm. (b) The ratio of the band-edge exciton emission area ( $S_1$ ) to surface-trap emission area ( $S_2$ ) plots to time, and pH change of the solution during passivation process.

#### 4. Component concentration effect and pH effect

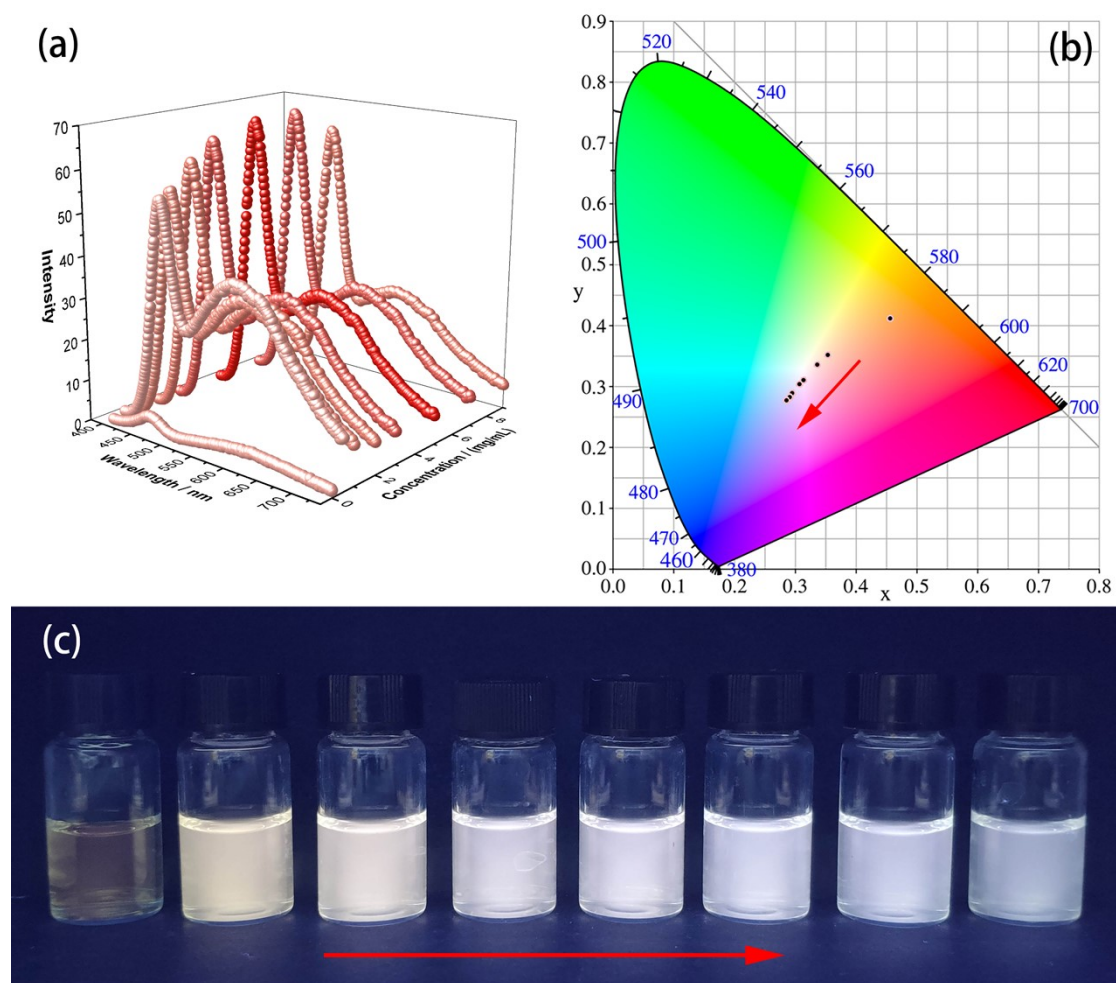

**Figure. S4** (a) PL spectrum of the CdSe@PEI aqueous solution with different PEI concentrations (0, 0.50, 1.00, 2.00, 3.00, 5.00, 7.00, 9.00 mg mL<sup>-1</sup>), excitation wavelength: 380 nm. (b) CIE coordinates of the samples. (c) The digital picture of the samples.

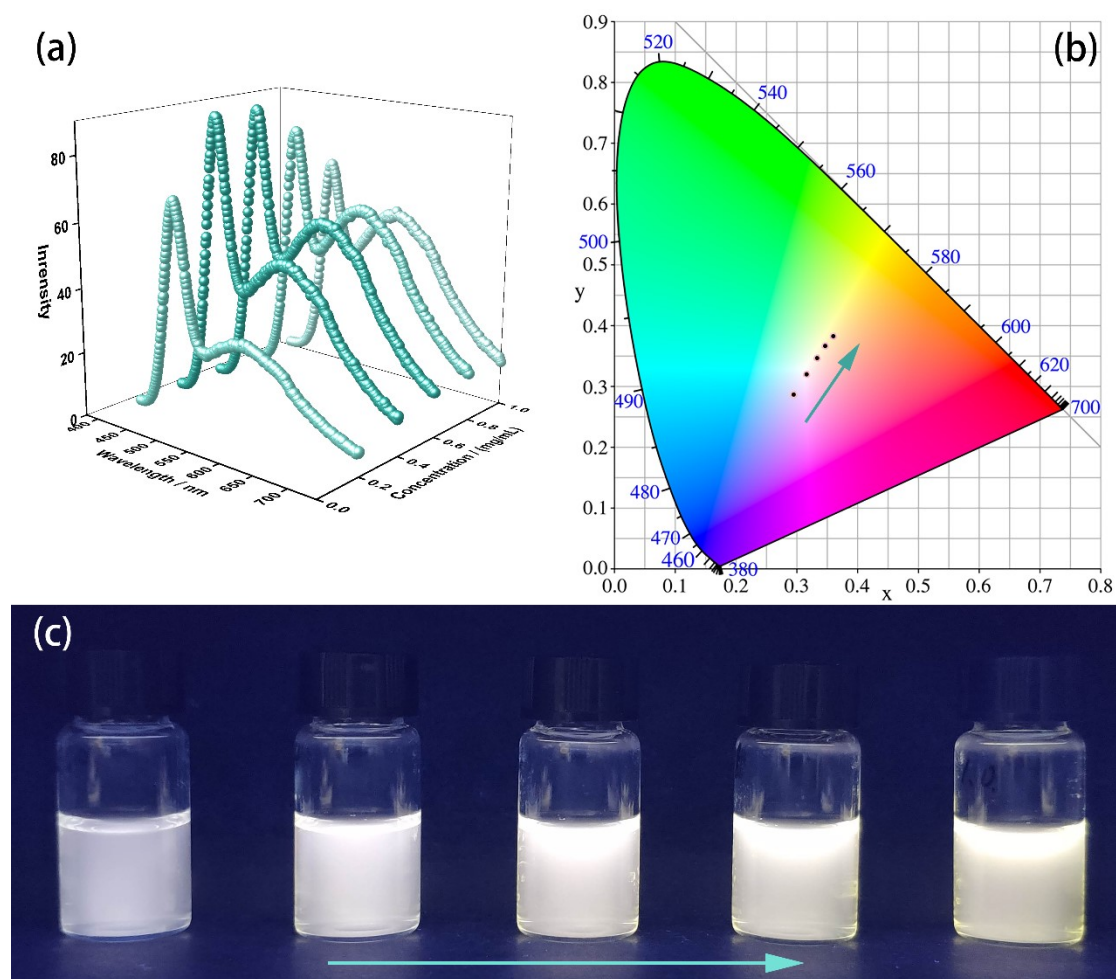

**Figure. S5** (a) PL spectrum of the CdSe@PEI aqueous solution with different CdSe concentrations ( $1.00 \times 10^{-5}$  M,  $1.60 \times 10^{-5}$  M,  $2.14 \times 10^{-5}$  M,  $2.75 \times 10^{-5}$  M,  $3.30 \times 10^{-5}$  M), excitation wavelength: 380 nm. (b) CIE coordinates of the samples. (c) The digital picture of the samples.

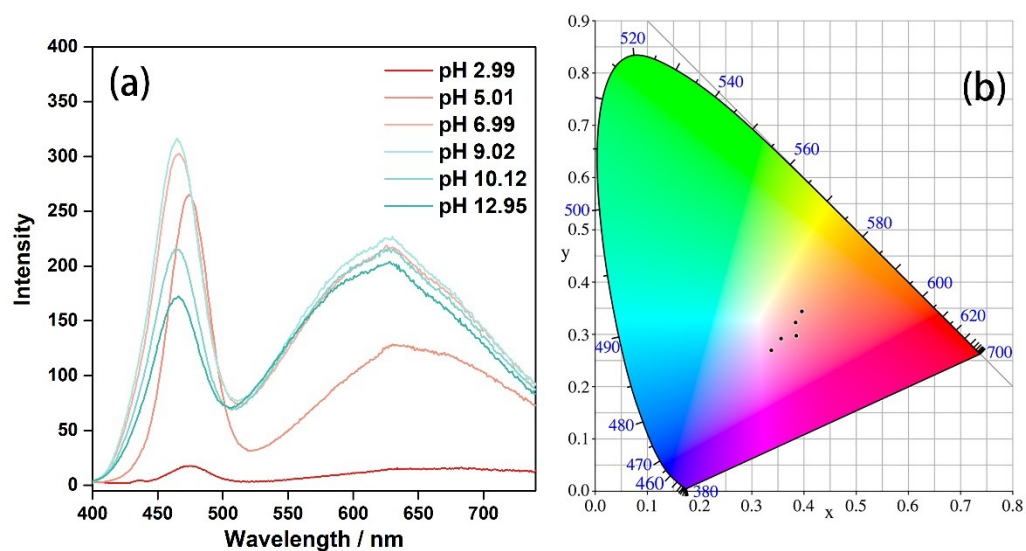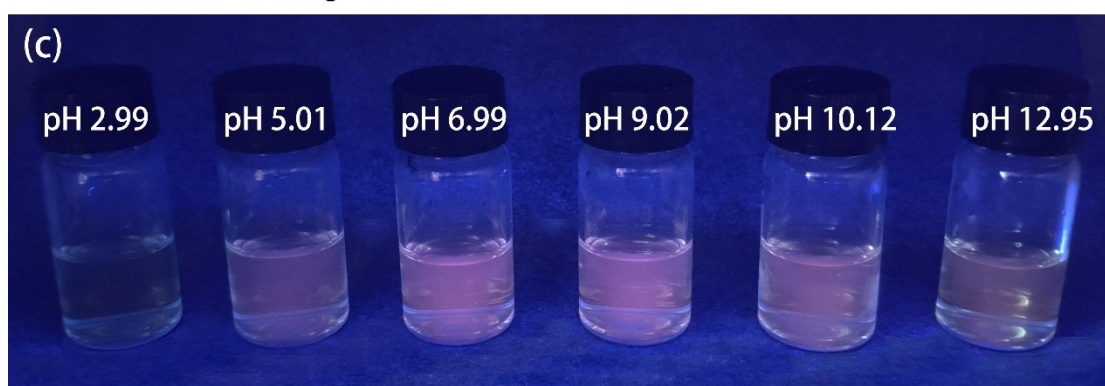

**Figure. S6** (a) PL spectrum of the CdSe aqueous solution ( $1.00 \times 10^{-5}$  M) at different pH, excitation wavelength: 380 nm. (b) CIE coordinates of the samples. (c) The digital picture of the samples.



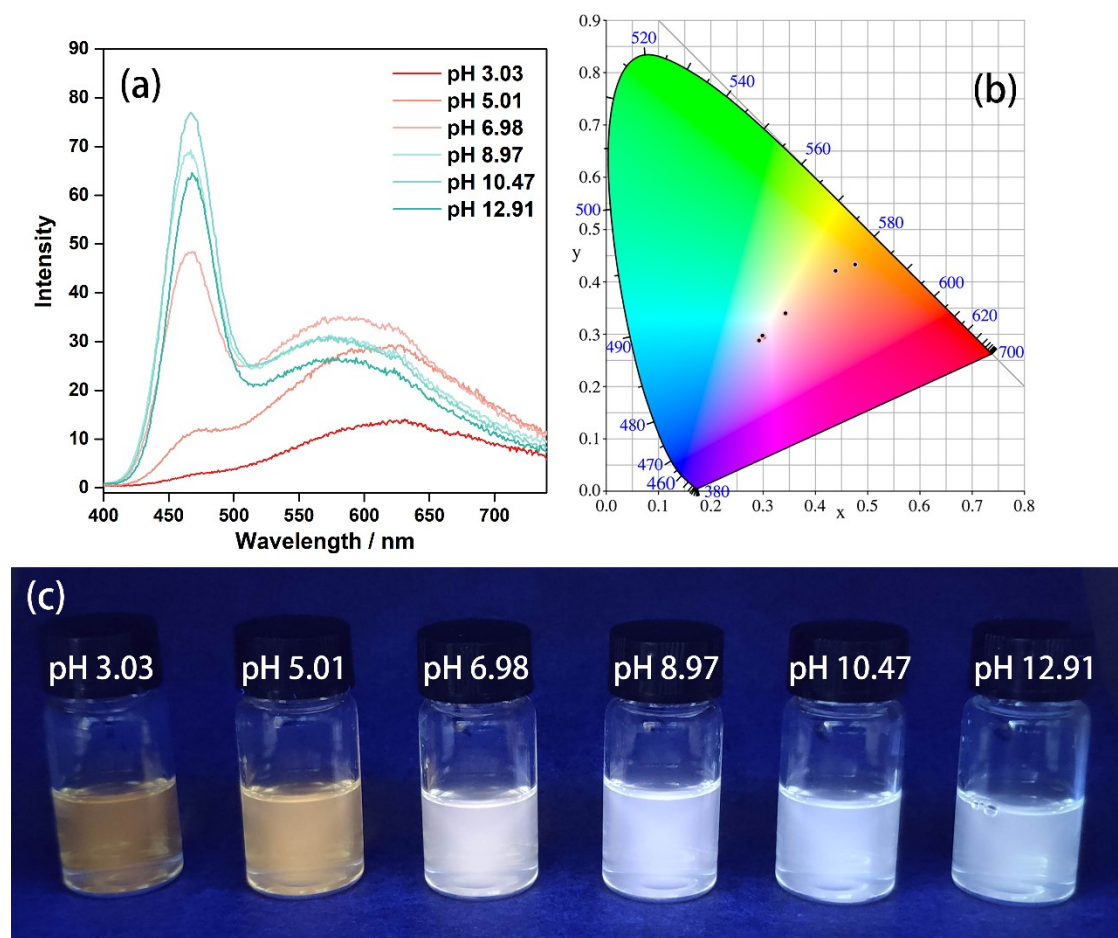

**Figure. S7** (a) PL spectrum of the CdSe@PEI aqueous solutions ( $[\text{CdSe}] = 1.00 \times 10^{-5}$  M,  $[\text{PEI}] = 2.00 \text{ mg mL}^{-1}$ ) at different pH, excitation wavelength: 380 nm. (b) CIE coordinates of the samples. (c) The digital picture of the samples.

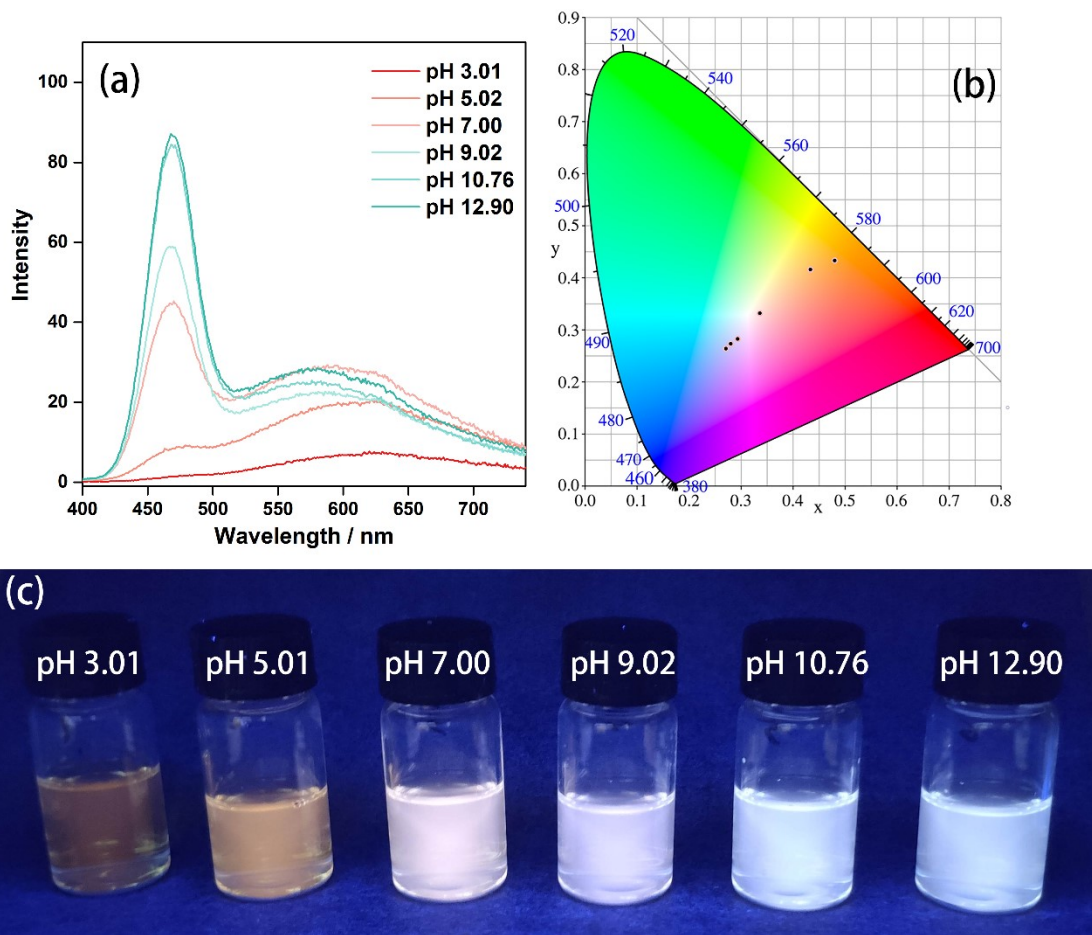

**Figure. S8** (a) PL spectrum of the CdSe@PEI aqueous solutions ( $[\text{CdSe}] = 1.00 \times 10^{-5}$  M,  $[\text{PEI}] = 7.00 \text{ mg mL}^{-1}$ ) at different pH, excitation wavelength: 380 nm. (b) CIE coordinates of the samples. (c) The digital picture of the samples.

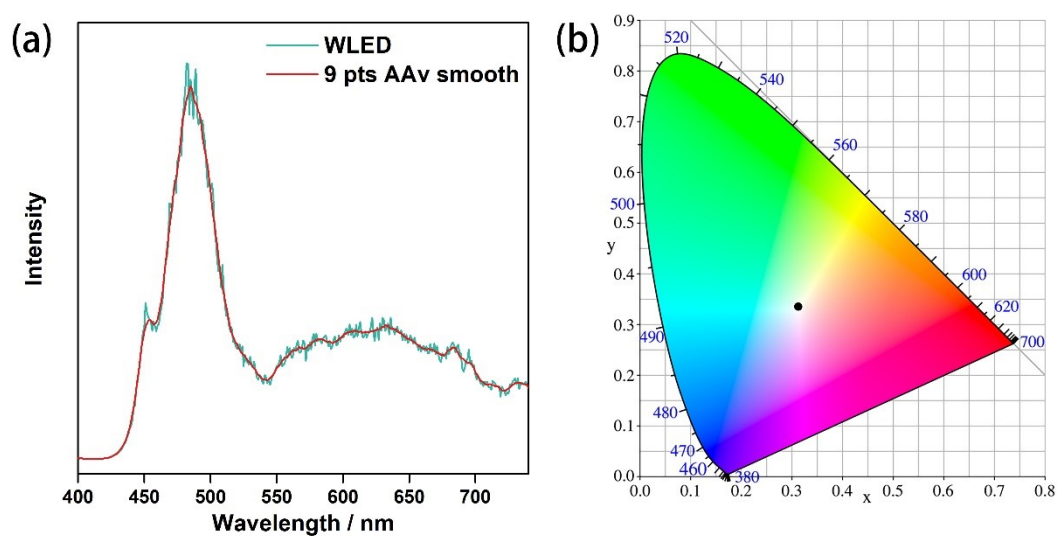

**Figure. S9** (a) Emission spectrum of the white light LED. (b) CIE coordinates of the white light LED.

## 5. TEM and CLSM images

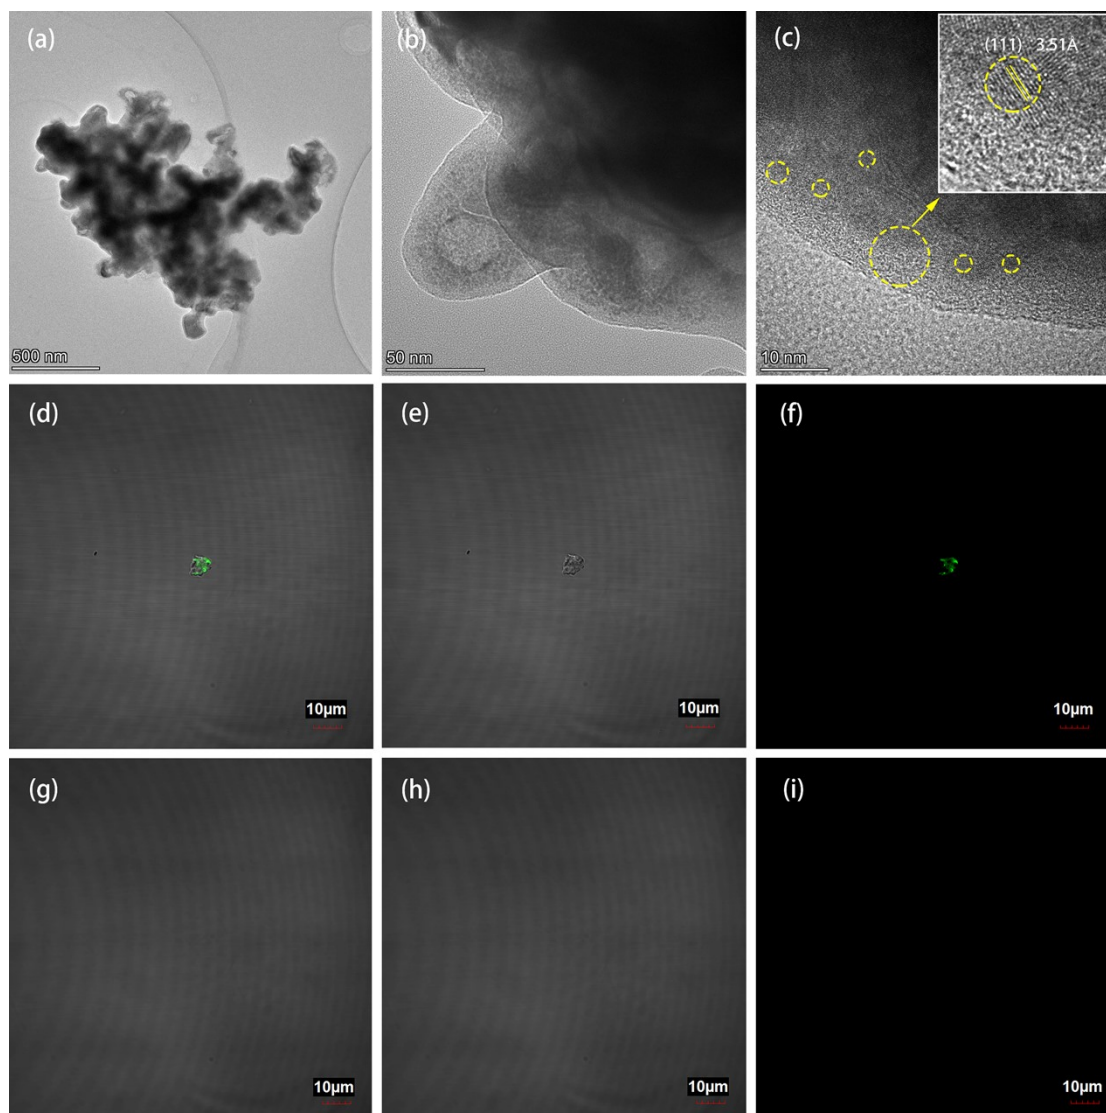

**Figure. S10** (a-c) TEM images of CdSe@PEI ( $[\text{CdSe}] = 1.00 \times 10^{-5} \text{ M}$ ,  $[\text{PEI}] = 5.00 \text{ mg mL}^{-1}$ ). (d-f) Confocal images of CdSe@PEI ( $[\text{CdSe}] = 1.00 \times 10^{-5} \text{ M}$ ,  $[\text{PEI}] = 5.00 \text{ mg mL}^{-1}$ ) in an aqueous solution. (g-i) Confocal images of MPA-CdSe ( $1.00 \times 10^{-5} \text{ M}$ ) in an aqueous solution.

## 6. Lifetimes

**Table S1.** The fitting lifetimes of MPA-CdSe and CdSe@PEI in aqueous solutions

| Entry    | $\lambda$ / nm | $\tau_1$ / ns | A <sub>1</sub> | $\tau_2$ / ns | A <sub>2</sub> | $\tau_{av}$ / ns |
|----------|----------------|---------------|----------------|---------------|----------------|------------------|
| CdSe     | 462            | 4.86          | 11.54          | 22.00         | 0.14           | 5.77             |
|          | 602            | 35.72         | 0.73           | 267.57        | 0.12           | 163.06           |
| PEI-CdSe | 464            | 26.56         | 1.16           | 134.61        | 0.32           | 89.98            |
|          | 562            | 50.00         | 0.70           | 227.90        | 0.47           | 183.96           |

## 7. Reference

- [1] Y.-S. Park, A. Dmytruk, I. Dmitruk, A. Kasuya, Y. Okamoto, N. Kaji, M. Toeshi, Y. Baba, *J. Phys. Chem. C*, 2010, **114**, 18834-18840.
- [2] C. Wang, H. Zhang, J. Zhang, N. Lv, M. Li, H. Sun, B. Yang, *J. Phys. Chem. C*, 2008, **112**, 6330-6336.
